# Supplementary material for: An intelligent readable and capture-antibody-independent lateral flow immunoassay based on Cu2−xSe nanocrystals for point-of-care detection of Escherichia coli O157:H7
Source: Royal Society of Chemistry journal article supplement (doi:10.1039/d3an01694c), 2023-11-22
Supplement: d3an01694c1.pdf [file d3an01694c1.pdf]

## **Electronic Supplementary Material (ESM)**

# **An intelligent readable and capture-antibody-independent lateral flow immunoassay based on $\text{Cu}_2\text{-}_x\text{Se}$ nanocrystals for point-of-care detection of *Escherichia coli* O157:H7**

**Yiyun Yao, Li Hou,\* Fenghuang Wei, Tianran Lin,\* and Shulin Zhao\***

School of Chemistry and Pharmaceutical Sciences, State Key Laboratory for Chemistry and Molecular Engineering of Medicinal Resources, Guangxi Normal University, Guilin 541004, People's Republic of China.

Email: houli@mailbox.gxnu.edu.cn; tianranlin@163.com; zhaoshulin001@163.com

## Experimental section

### Materials and reagents

Cetyltrimethyl Ammonium bromide (CTAB), selenium dioxide ( $\text{SeO}_2$ ), copper(II) sulfate pentahydrate ( $\text{CuSO}_4 \cdot 5\text{H}_2\text{O}$ ), ascorbic acid (AA), tween-20, tris (hydroxymethyl) aminomethane (Tris), disodium hydrogen phosphate ( $\text{Na}_2\text{HPO}_4$ ), and 5,5-dimethyl-1-pyrroline-N-oxide (DMPO) were purchased from Aladdin Biochemical Co., Ltd (Shanghai, China). 3,3',5,5' - tetramethylbenzidine (TMB) was purchased from Shanghai Sangon Biotech Co., Ltd (Shanghai, China). Monosodium phosphate ( $\text{NaH}_2\text{PO}_4$ ) was purchased from Thain Chemical Technology Co., Ltd (Shanghai, China).  $\text{H}_2\text{O}_2$  (30%) and hydrochloric acid (HCl) were purchased from Xilong Science Co., Ltd (Guangdong, China). The dialysis bag (10 KD) was purchased from Shanghai Yuanye Biotechnology Co., Ltd (Shanghai, China). The culture medium used for bacterial cultivation was purchased from Guangdong Biyuntian Biotechnology Co., Ltd (Guangdong, China). *Escherichia coli* O157:H7 (*E. coli* O157:H7, NCTC 12900), *Escherichia coli* (*E. coli*, ATCC 29522), *Salmonella typhimurium* (*S. typhimurium*, ATCC 14028), *Staphylococcus aureus* (*S. aureus*, ATCC 25923) and *Bacillus subtilis* (*B. subtilis*, ATCC 6633) were purchased from Guangzhou Huankai Microbial Technology Co., Ltd (Guangdong, China). Fetal bovine serum (FBS) was purchased from Saiye Biotechnology Co., Ltd (Guangdong, China). *E. coli* O157:H7 monoclonal antibody was purchased from Keyue Zhongkai Biotechnology Co., Ltd. (Beijing, China) The simple film scribing kit, nitrocellulose (NC) film, sample pad (Ahlstrom), absorbent pad, and PVC base plate were purchased from Shanghai Jieyi Biotechnology Co., Ltd (Shanghai, China). All chemical reagents were of analytical grade and used without further purification. The solution was prepared from deionized water ( $\geq 18.2 \text{ m}\Omega \text{ cm}^{-1}$ ) obtained by the Milli-Q Water purification system (Milli-Q, Millipore, USA).

### Experimental instruments and characterization

The morphology and dispersion of  $\text{Cu}_{2-x}\text{Se}$  NCs synthesized were analyzed and characterized by an EOL 200 kV field emission transmission electron microscopy (FE-

TEM, JEM-2100F, Japan), and the element mapping images of  $\text{Cu}_{2-x}\text{Se}$  NCs were recorded by an energy dispersive X-ray spectrometer (EDS); The hydration particle size and Zeta potential of  $\text{Cu}_{2-x}\text{Se}$  NCs were determined by using the Zetasizer Nano ZS90 potential analyzer (Malvern, UK); X-ray photoelectron spectroscopy (XPS) was measured by using Thermo Scientific ESCALAB 250Xi electron spectroscopy (Thermo, USA); Obtaining SEM images using Quanta200 field emission scanning electron microscopy (SEM) (Thermo, USA); Fourier transform infrared (FTIR) spectroscopy was measured by using a Nicolet 5700 infrared spectrometer (Thermo, USA); The electron paramagnetic resonance (EPR) spectrum was obtained by using a Bruker A300 electron paramagnetic resonance spectrometer (Bruker, Germany). The peroxidase-like activity of  $\text{Cu}_{2-x}\text{Se}$  NCs was verified by using a TECAN Spark enzyme marker (TECAN, Switzerland); HC-2064 high-speed centrifuge (Zhongjia, China) was used for synthesizing the  $\text{Cu}_{2-x}\text{Se}$  NCs; The constant temperature mixer (Mio, China) was used for reagent mixing and incubation.

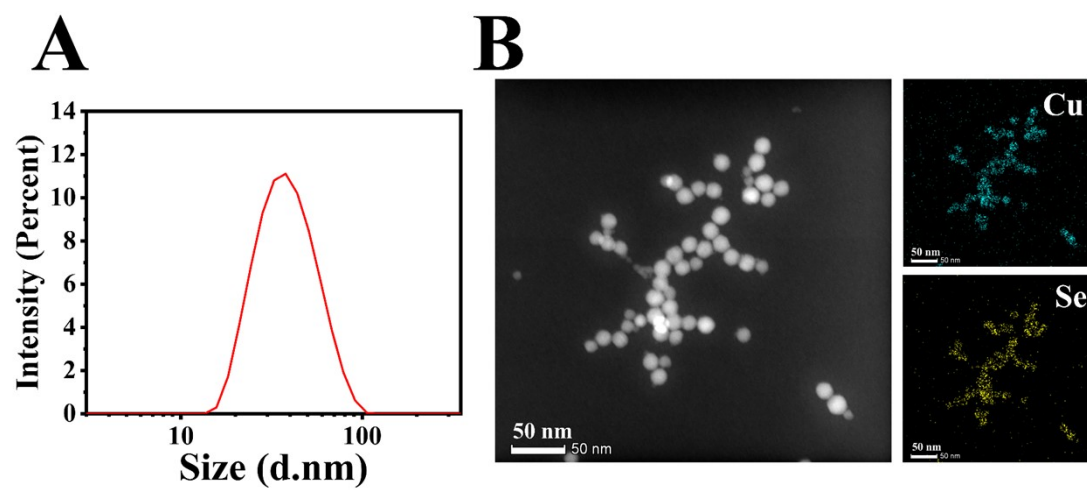

**Fig. S1** (A) The hydrodynamic size of  $\text{Cu}_{2-x}\text{Se}$  NCs. (B) The EDS-mapping of  $\text{Cu}_{2-x}\text{Se}$  NCs.

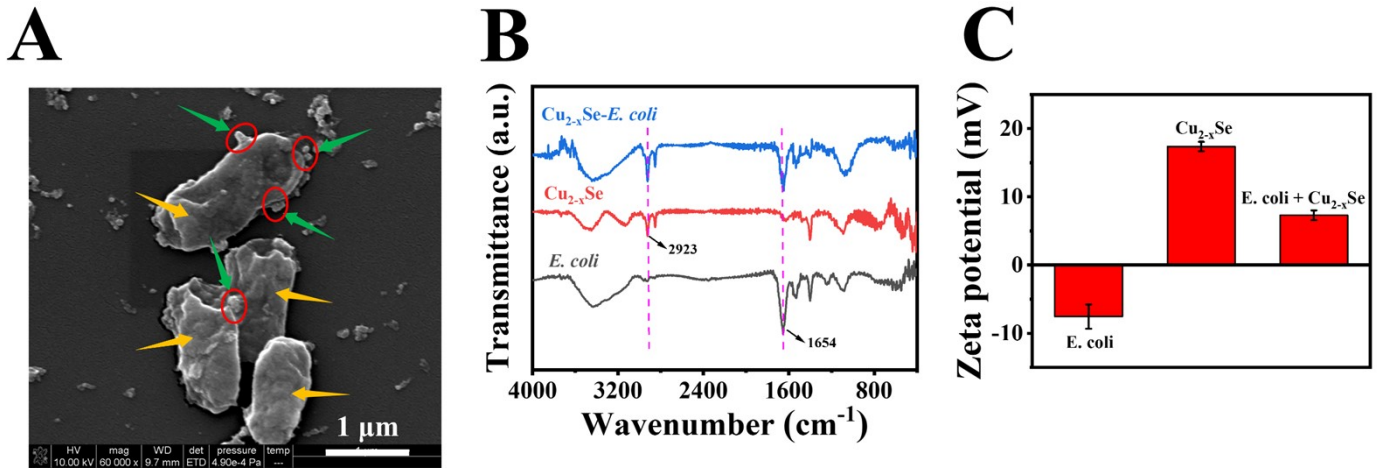

**Fig. S2** (A) SEM images of  $\text{Cu}_{2-x}\text{Se}$ -*E. coli* O157:H7 complexes (the green arrows indicate  $\text{Cu}_{2-x}\text{Se}$  NCs, the orange arrows indicate *E. coli* O157:H7, and the circle indicates that  $\text{Cu}_{2-x}\text{Se}$  NCs aggregate on the surface of *E. coli* O157:H7). (B) FT-IR spectroscopy of *E. coli* O157:H7,  $\text{Cu}_{2-x}\text{Se}$  NCs and  $\text{Cu}_{2-x}\text{Se}$ -*E. coli* O157:H7 complexes. (C) The zeta potential of *E. coli* O157:H7,  $\text{Cu}_{2-x}\text{Se}$  NCs and  $\text{Cu}_{2-x}\text{Se}$ -*E. coli* O157:H7 complexes.

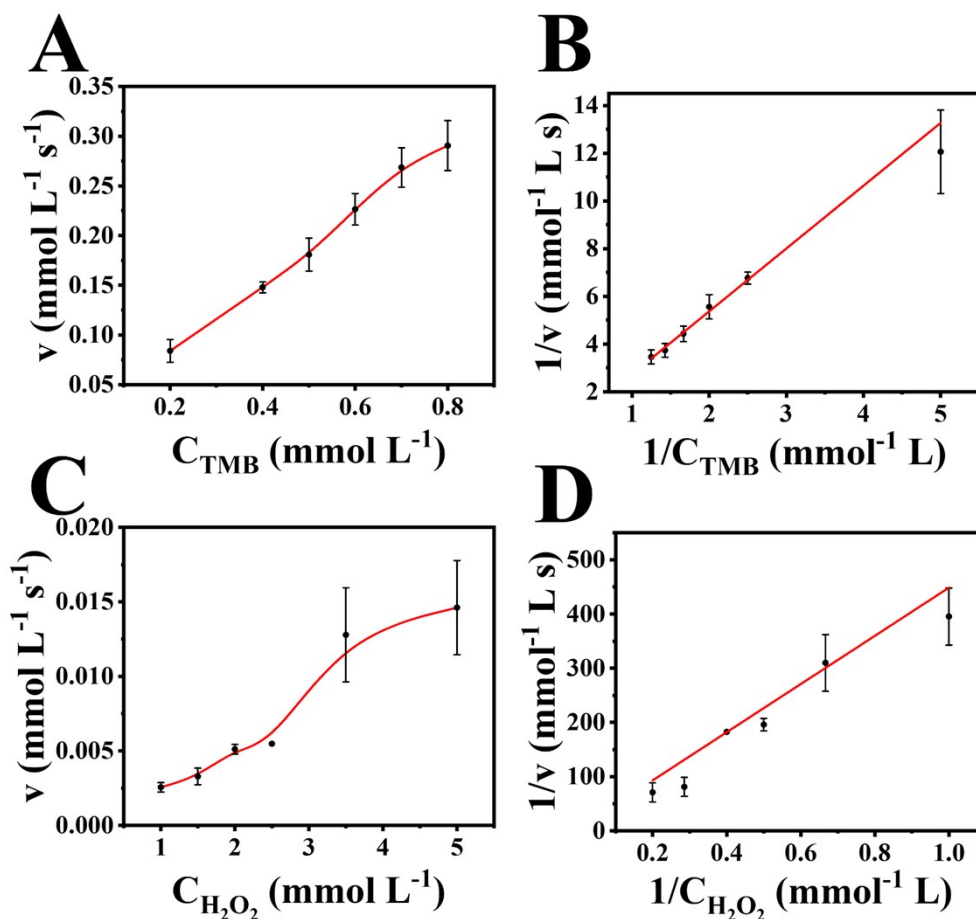

**Fig. S3** (A) Michaelis-Menten curve under 2.5% H<sub>2</sub>O<sub>2</sub> and various TMB concentrations, (B) Line-weaver-Burk plot for TMB. (C) Michaelis-Menten curve under 20 mmol L<sup>-1</sup> TMB with various H<sub>2</sub>O<sub>2</sub> concentrations, (D) Line-weaver-Burk plot for H<sub>2</sub>O<sub>2</sub>.

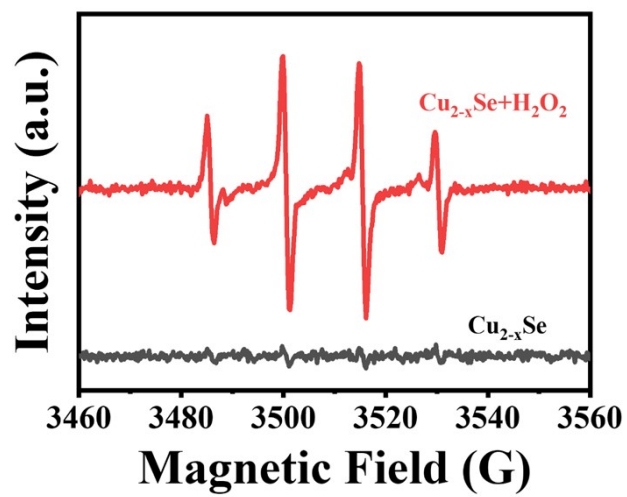

**Fig. S4** EPR spectra of Cu<sub>2-x</sub>Se+H<sub>2</sub>O<sub>2</sub>+DMPO and Cu<sub>2-x</sub>Se+DMPO.

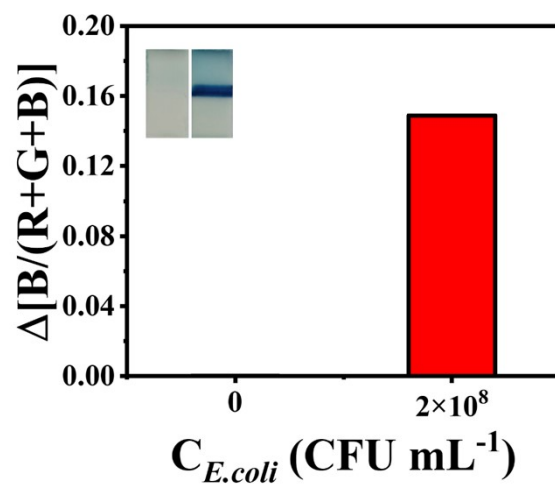

**Fig. S5** Test strip signal strength of samples with or without *E. coli* O157:H7.



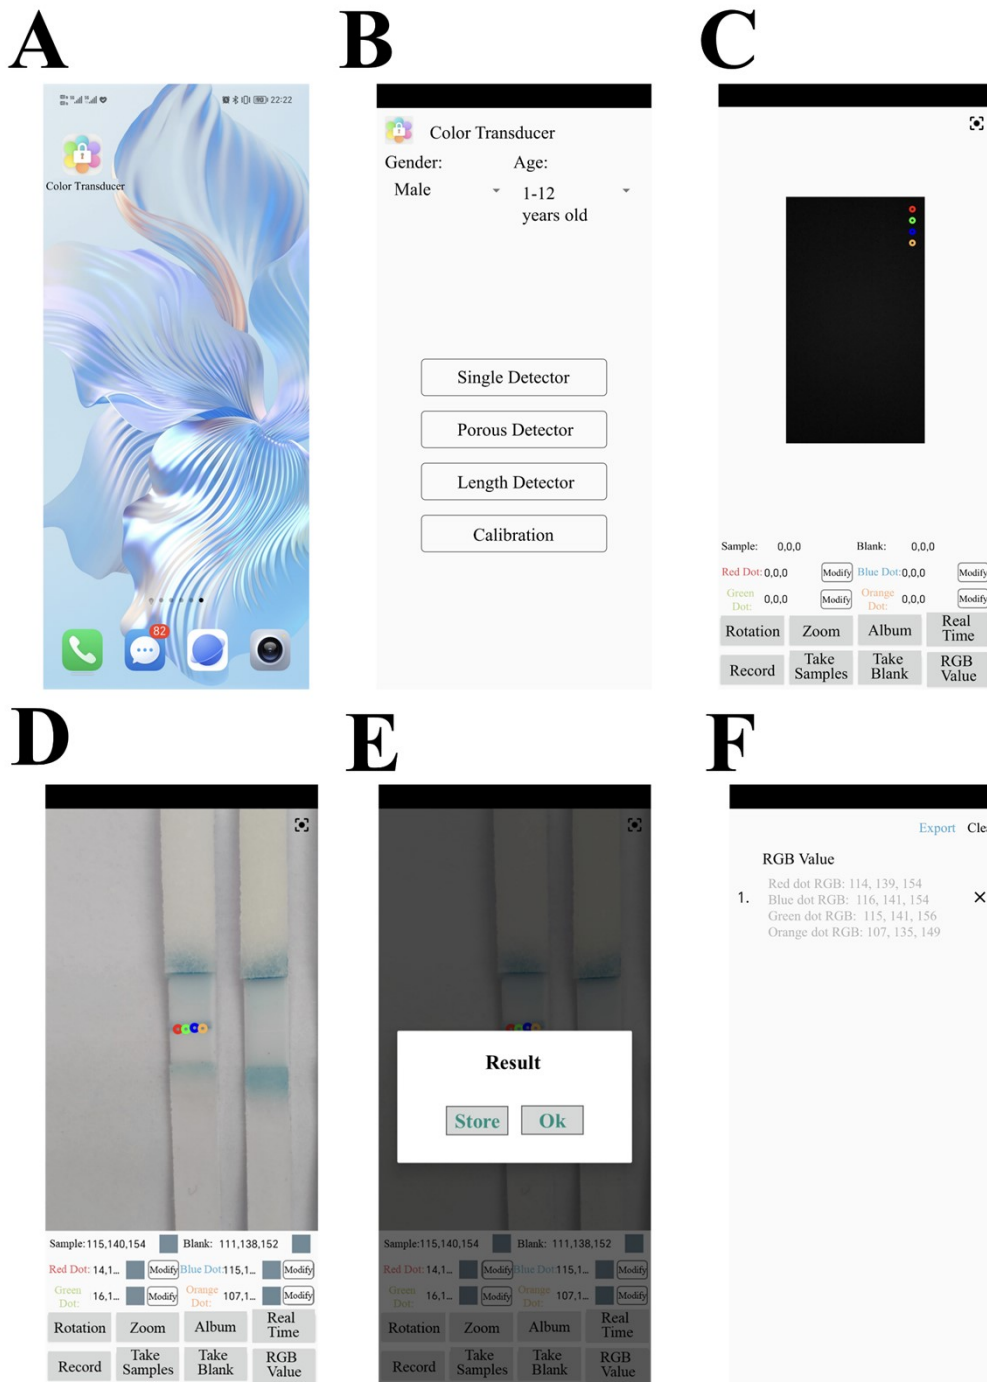

**Fig. S6** Operation steps for analyzing the RGB signal strength on the T-line of the test strip using the Color Transducer App.

**Table S1** Comparison of kinetic parameters between Cu<sub>2-x</sub>Se NCs and other catalysts

| Catalyst                             | Substance                     | K <sub>m</sub> (mmol L <sup>-1</sup> ) | V <sub>max</sub> (μmol s <sup>-1</sup> ) | Reference |
|--------------------------------------|-------------------------------|----------------------------------------|------------------------------------------|-----------|
| HRP                                  | TMB                           | 0.434                                  | 10.00×10 <sup>-2</sup>                   | 1         |
|                                      | H <sub>2</sub> O <sub>2</sub> | 3.70                                   | 8.71×10 <sup>-2</sup>                    |           |
| AgPt-Fe <sub>3</sub> O <sub>4</sub>  | TMB                           | 0.442                                  | 4.763×10 <sup>-2</sup>                   | 2         |
|                                      | H <sub>2</sub> O <sub>2</sub> | 3.463                                  | 2.076×10 <sup>-2</sup>                   |           |
| FeS <sub>2</sub>                     | TMB                           | 8.202                                  | 0.184                                    | 3         |
|                                      | H <sub>2</sub> O <sub>2</sub> | 0.242                                  | 0.490                                    |           |
| R-Fe <sub>3</sub> O <sub>4</sub> /Au | TMB                           | 0.13                                   | 6.22                                     | 4         |
|                                      | H <sub>2</sub> O <sub>2</sub> | 5.34                                   | 24.10                                    |           |
| Au@Hg <sup>0</sup> /WO <sub>3</sub>  | TMB                           | -                                      | -                                        | 5         |
| HNFs                                 | H <sub>2</sub> O <sub>2</sub> | 145.58                                 | 220.75                                   |           |
| Cu <sub>2-x</sub> Se NCs             | TMB                           | 1.23                                   | 467.34                                   | This work |
|                                      | H <sub>2</sub> O <sub>2</sub> | 1.80                                   | 4.05                                     |           |

**Table S2** Performance comparison with other methods for detecting *E. coli* O157:H7

| Methods      | Type                                                                   | Linear range (CFU mL <sup>-1</sup> )       | Detection limit (CFU mL <sup>-1</sup> ) | Reference |
|--------------|------------------------------------------------------------------------|--------------------------------------------|-----------------------------------------|-----------|
| Colorimetry  | Aptamer-modified AuNPs decorated on polystyrene microparticles (PS-Au) | 10 <sup>8</sup> -10 <sup>3</sup>           | 10 <sup>3</sup>                         | 6         |
| Fluorescence | CQDs magnetic nanoparticles (CQDs-MNPs)                                | 1×10 <sup>6</sup> -5×10 <sup>2</sup>       | 4.87×10 <sup>2</sup>                    | 7         |
|              | BCD@SiO <sub>2</sub> @AuNC                                             | 10 <sup>7</sup> -10 <sup>3</sup>           | 1.50×10 <sup>2</sup>                    | 8         |
| Photothermal | MPBA induced aggregation of MPBA-AuNPs                                 | 10 <sup>9</sup> -10 <sup>6</sup>           | 1.97×10 <sup>4</sup>                    | 9         |
|              | AuNPs                                                                  | 10 <sup>8</sup> -10 <sup>6</sup>           | 10 <sup>6</sup>                         | 10        |
|              | CoFe <sub>2</sub> O <sub>4</sub> nanoparticles                         | 10 <sup>8</sup> -10 <sup>3</sup>           | 10 <sup>3</sup>                         | 11        |
| LFIA         | Fluorescent microsphere                                                | 1×10 <sup>6</sup> -5×10 <sup>3</sup>       | 3.98×10 <sup>3</sup>                    | 12        |
|              | Lac dye                                                                | 10 <sup>8</sup> -10 <sup>6</sup>           | 10 <sup>6</sup>                         | 13        |
|              | Mannose modified Prussian blue                                         | 10 <sup>8</sup> -10 <sup>2</sup>           | 10 <sup>2</sup>                         | 14        |
|              | Au-PMBA nanocrabs                                                      | 10 <sup>7</sup> -10 <sup>3</sup>           | 10 <sup>3</sup>                         | 15        |
|              | Cu <sub>2-x</sub> Se NCs                                               | 4.16×10 <sup>7</sup> -4.16×10 <sup>5</sup> | 2.65×10 <sup>5</sup>                    | This work |

## References

1. M. Song, J. Xing, H. Cai, X. Gao, C. Li, C. Liu, X. Li, X. Fu, S. Ding, W. Cheng and R. Chen, *ACS Nano*, 2023, **17**, 10748-10759.
2. W. Duan, J. Wang, X. Peng, S. Cao, J. Shang, Z. Qiu, X. Lu and J. Zeng, *Biosens. Bioelectron.*, 2023, **223**, 115022.
3. X. Meng, S. Zou, D. Li, J. He, L. Fang, H. Wang, X. Yan, D. Duan and L. Gao, *Biosens. Bioelectron.*, 2022, **217**, 114739.
4. Y. Huang, Y. Gu, X. Liu, T. Deng, S. Dai, J. Qu, G. Yang and L. Qu, *Biosens. Bioelectron.*, 2022, **209**, 114253.
5. L. Zhi, S. Zhang, M. Li, J. Tu and X. Lu, *ACS Appl. Mater. Interfaces*, 2022, **14**, 9442-9453.
6. S. Somvanshi, A. Ulloa, M. Zhao, Q. Liang, A. Barui, A. Lucas, K. Jadhav, J. Allebach and L. Stanciu, *Biosens. Bioelectron.*, 2022, **207**, 114214.
7. X. Hu, Y. Li, Y. Xu, Z. Gan, X. Zou, J. Shi, X. Huang, Z. Li and Y. Li, *Food Chem.*, 2021, **339**, 127775.
8. L. Fu, Q. Chen and L. Jia, *Food Chem.*, 2022, **374**, 131750.
9. L. Zheng, W. Dong, C. Zheng, Y. Shen, R. Zhou, Z. Wei, Z. Chen and Y. Lou, *Colloids Surf., B*, 2022, **212**, 112349.
10. C. Song, C. Liu, S. Wu, H. Li, H. Guo, B. Yang, S. Qiu, J. Li, L. Liu, H. Zeng, X. Zhai and Q. Liu, *Food Control*, 2016, **59**, 345-351.
11. Y. Chen, J. Ma, X. Yin, Z. Deng, X. Liu, D. Yang, L. Zhao, J. Sun, J. Wang and D. Zhang, *Biosens. Bioelectron.*, 2023, **224**, 115075.
12. G. Zhang, S. Xu, Y. Xiong, H. Duan, W. Chen, X. Li, M. Yuan and W. Lai, *Biosens. Bioelectron.*, 2019, **135**, 173-180.
13. C. Liu, S. Fang, Y. Tian, J. Ma, Z. Wang, D. Xu, Y. Li, D. Hou and Q. Liu, *J. Food Saf.*, 2020, **41**, e12862.
14. Z. Wang, X. Yao, Y. Zhang, R. Wang, Y. Ji, J. Sun, D. Zhang and J. Wang, *Food Chem.*, 2020, **329**, 127224.
15. P. Wu, F. Xue, W. Zuo, J. Yang, X. Liu, H. Jiang, J. Dai and Y. Ju, *Anal. Chem.*, 2022, **94**, 4277-4285.
